# Supplementary material for: Describing the effect of COVID-19 on sexual and healthcare-seeking behaviours of men who have sex with men in three counties in Kenya: a cross-sectional study
Source: HighWire-hosted journal article supplement (doi:10.1136/sextrans-2024-056105), 2024-07-04

**Supplemental Table S1: Crude Odds Ratios (OR) and 95% Confidence Intervals (95% CI) from Bivariate Models, Association between Selected Characteristics and Reported Changes in Risk Behaviours and Experiences of Violence, Men who have Sex with Men (MSM) enrolled in HIV Self-Test Study in Kisumu, Kiambu, and Mombasa Counties (Kenya, 2020)**

|                                       |                                 | Increase in Male Sexual Partners per Week | p-value | Increase in Alcohol Use | p-value | Increase in drug use | p-value | Increase/Sustained violence from police/authorities | p-value | Increase/Sustained violence from intimate partners | p-value |
|---------------------------------------|---------------------------------|-------------------------------------------|---------|-------------------------|---------|----------------------|---------|-----------------------------------------------------|---------|----------------------------------------------------|---------|
|                                       |                                 | OR (95% CI)                               |         | OR (95% CI)             |         | OR (95% CI)          |         | OR (95% CI)                                         |         | OR (95% CI)                                        |         |
| <b>Age Group</b>                      |                                 |                                           |         |                         |         |                      |         |                                                     |         |                                                    |         |
|                                       | <21                             | 0.89 (0.37, 2.12)                         | 0.796   | 0.83 (0.40, 1.73)       | 0.626   | 1.08 (0.51, 2.32)    | 0.837   | 0.75 (0.36, 1.55)                                   | 0.435   | 0.60 (0.25, 1.42)                                  | 0.241   |
|                                       | 21-24                           | 0.92 (0.44, 1.95)                         | 0.836   | 1.04 (0.57, 1.93)       | 0.890   | 1.13 (0.58, 2.20)    | 0.714   | 1.36 (0.75, 2.44)                                   | 0.308   | 0.89 (0.45, 1.78)                                  | 0.745   |
|                                       | 25-29                           | 0.78 (0.34, 1.77)                         | 0.547   | 1.02 (0.53, 1.97)       | 0.960   | 0.90 (0.44, 1.84)    | 0.764   | 1.31 (0.70, 2.43)                                   | 0.399   | 0.76 (0.36, 1.63)                                  | 0.482   |
|                                       | 30+                             | ref                                       |         | ref                     |         | ref                  |         | ref                                                 |         | ref                                                |         |
| <b>County</b>                         |                                 |                                           |         |                         |         |                      |         |                                                     |         |                                                    |         |
|                                       | Kiambu                          | 1.08 (0.56, 2.10)                         | 0.821   | 2.60 (1.59, 4.26)       | 0.000   | 0.72 (0.45, 1.16)    | 0.177   | 0.07 (0.03, 0.14)                                   | <0.0001 | 0.18 (0.08, 0.39)                                  | <0.0001 |
|                                       | Kisumu                          | ref                                       |         | ref                     |         | ref                  |         | ref                                                 |         | ref                                                |         |
|                                       | Mombasa                         | 1.63 (0.90, 2.95)                         | 0.106   | 1.32 (0.77, 2.27)       | 0.306   | 0.39 (0.23, 0.65)    | 0.000   | 0.16 (0.10, 0.28)                                   | <0.0001 | 0.46 (0.27, 0.80)                                  | 0.006   |
| <b>Highest Level of Education</b>     |                                 |                                           |         |                         |         |                      |         |                                                     |         |                                                    |         |
|                                       | Up to Primary                   | ref                                       |         | ref                     |         | ref                  |         | ref                                                 |         | ref                                                |         |
|                                       | Secondary                       | 0.46 (0.23, 0.90)                         | 0.023   | 2.77 (0.97, 7.88)       | 0.056   | 0.91 (0.46, 1.78)    | 0.780   | 1.35 (0.69, 2.68)                                   | 0.384   | 0.80 (0.37, 1.74)                                  | 0.576   |
|                                       | Post-Secondary                  | 0.33 (0.17, 0.68)                         | 0.002   | 3.83 (1.36, 10.77)      | 0.011   | 1.09 (0.56, 2.11)    | 0.807   | 1.30 (0.66, 2.58)                                   | 0.445   | 0.84 (0.39, 1.82)                                  | 0.661   |
| <b>Places where Male Partners Met</b> |                                 |                                           |         |                         |         |                      |         |                                                     |         |                                                    |         |
|                                       | Both physical and virtual sites | ref                                       |         | ref                     |         | ref                  |         | ref                                                 |         | ref                                                |         |
|                                       | Physical sites                  | 0.98 (0.45, 2.14)                         | 0.968   | 0.98 (0.51, 1.86)       | 0.941   | 1.11 (0.59, 2.08)    | 0.745   | 0.98 (0.57, 1.70)                                   | 0.952   | 0.63 (0.28, 1.40)                                  | 0.253   |
|                                       | Virtual sites                   | 0.95 (0.49, 1.83)                         | 0.880   | 1.55 (0.97, 2.48)       | 0.069   | 1.29 (0.79, 2.10)    | 0.317   | 0.21 (0.10, 0.45)                                   | <0.0001 | 0.34 (0.14, 0.79)                                  | 0.013   |
| <b>Sexual Position Preference</b>     |                                 |                                           |         |                         |         |                      |         |                                                     |         |                                                    |         |
|                                       | Predominantly receptive         | ref                                       |         | ref                     |         | ref                  |         | ref                                                 |         | ref                                                |         |
|                                       | Predominantly insertive         | 0.63 (0.33, 1.21)                         | 0.162   | 0.90 (0.53, 1.52)       | 0.681   | 1.04 (0.61, 1.79)    | 0.889   | 1.42 (0.88, 2.30)                                   | 0.156   | 1.10 (0.58, 2.09)                                  | 0.763   |

|                                                               |                   |       |                   |       |                   |       |                   |       |                   |       |
|---------------------------------------------------------------|-------------------|-------|-------------------|-------|-------------------|-------|-------------------|-------|-------------------|-------|
| Both receptive and insertive                                  | 0.93 (0.48, 1.80) | 0.832 | 1.09 (0.62, 1.90) | 0.766 | 0.89 (0.49, 1.60) | 0.686 | 0.81 (0.47, 1.42) | 0.461 | 0.99 (0.49, 1.97) | 0.968 |
| <b>Received money/gift in exchange of sex with man (ever)</b> |                   |       |                   |       |                   |       |                   |       |                   |       |
| No                                                            | ref               |       |
| Yes                                                           | 1.07 (0.64, 1.81) | 0.787 | 0.79 (0.53, 1.19) | 0.259 | 1.27 (0.83, 1.95) | 0.273 | 2.22 (1.46, 3.36) | 0.000 | 2.16 (1.24, 3.77) | 0.007 |
| <b>Condom use with last male sexual partner</b>               |                   |       |                   |       |                   |       |                   |       |                   |       |
| No                                                            | ref               |       |
| Yes                                                           | 1.23 (0.71, 2.13) | 0.466 | 1.00 (0.66, 1.53) | 0.994 | 1.40 (0.90, 2.17) | 0.134 | 1.14 (0.77, 1.69) | 0.514 | 0.90 (0.55, 1.48) | 0.681 |
| <b>HIV status</b>                                             |                   |       |                   |       |                   |       |                   |       |                   |       |
| Negative                                                      | ref               |       |
| Positive                                                      | 1.42 (0.79, 2.55) | 0.246 | 1.14 (0.70, 1.86) | 0.603 | 0.68 (0.39, 1.21) | 0.189 | 0.27 (0.13, 0.54) | 0.000 | 1.19 (0.67, 2.12) | 0.552 |

**Supplemental Figure 1: Number of Different Male Sex Partners in the Past Week, by Perceived Change in Partnership Patterns, Men who have Sex with Men (MSM) enrolled in HIV Self-Test Study in Kenya During First Wave of COVID, 2020 (N=1,031)**

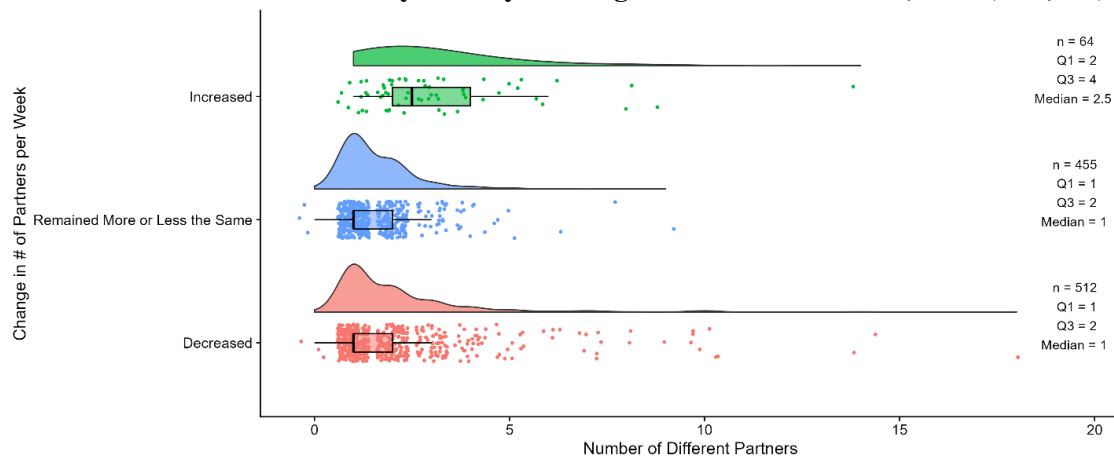

**Supplemental Figure 2: HIV testing frequency and testing options used, Men who have Sex with Men (MSM) enrolled in HIV Self-Test Study in Kenya During First Wave of COVID, 2020 (N=1,031)**

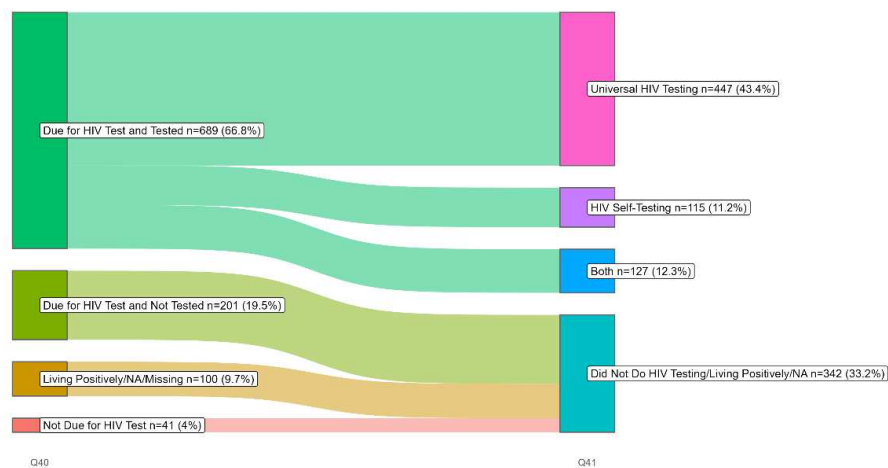

**Supplemental Figure 3: Places where participants met sex partners, Men who have Sex with Men (MSM) enrolled in HIV Self-Test Study in Kenya During First Wave of COVID, 2020 (N=1,031)**

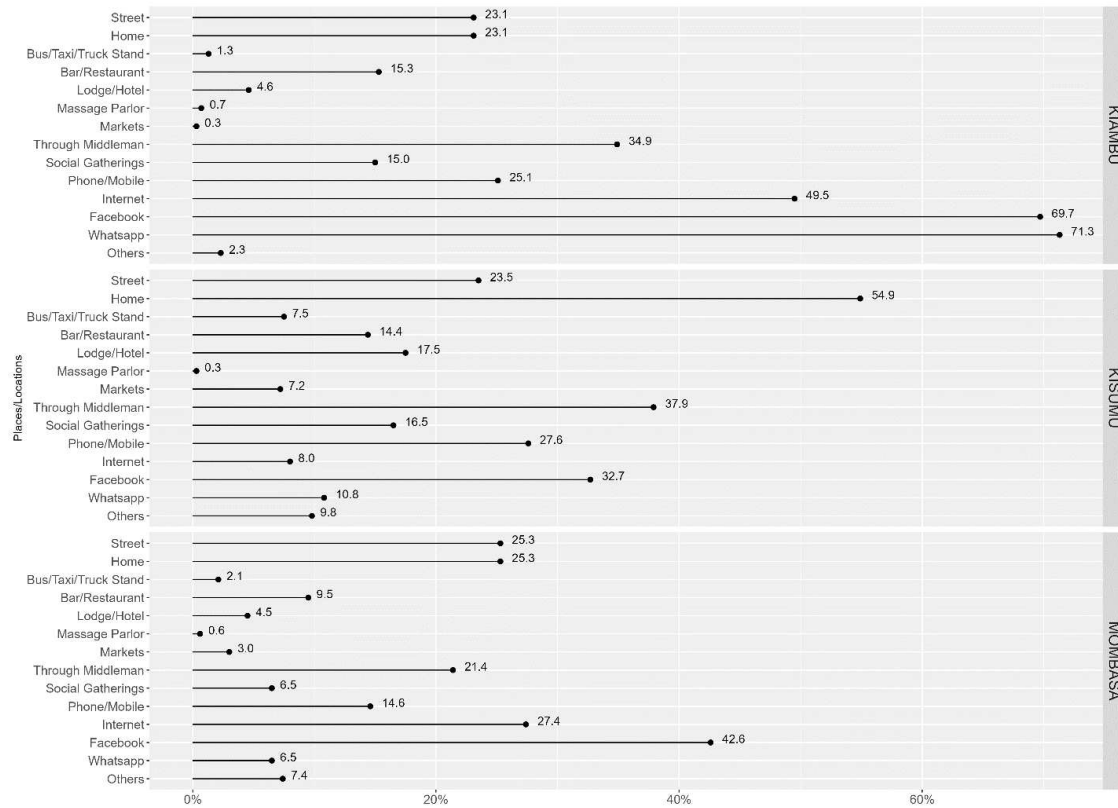

Supplement: sextrans-2024-056105supp001_data_supplement.pdf [file sextrans-2024-056105supp001_data_supplement.pdf]
